# Supplementary material
Source: publisher figshare collection journal article supplement (https://tandf.figshare.com/ndownloader/files/30824688)
Supplement: Supplementary file 1 [file 30824688]

| Appendix E. Patient reported outcomes: EPIC-26 sexual and hormonal symptoms at different time points | | | | | | | | | |
| --- | --- | --- | --- | --- | --- | --- | --- | --- | --- |
|  | **Symptoms** | **Baseline**  **(N=71-74)** | **Post-RT**  **(N=69-77)** | **3 months**  **(N=72-82)** | **6 months**  **(N=72-81)** | **12 months**  **(N=74-82)** | **24 months**  **(N=69-78)** | **36 months**  **(N=69-74)** | **60 months**  **(N=55-63)** |
| Sexual domain | Ability to gain erection* | 55(74) | 72(94) | 74(90) | 72(89) | 74(90) | 73(94) | 70(95) | 41(65) |
| Ability to reach orgasm* | 50(68) | 67(87) | 67(82) | 68(84) | 71(87) | 69(89) | 66(89) | 38(60) |
| Erection not firm enough for  Intercourse* | 57(77) | 69(90) | 75(92) | 72(89) | 73(90) | 72(92) | 68(92) | 42(67) |
| Erections achieved less than half  The time when desired | 49(66) | 63(82) | 69(84) | 66(82) | 68(83) | 63(81) | 65(88) | 31(49) |
| Ability to function sexually* | 54(73) | 67(87) | 73(89) | 73(90) | 72(88) | 73(94) | 69(93) | 35(56) |
| Overall sexuality function£ | 30(41) | 35(46) | 43(52) | 39(48) | 37(45) | 42(54) | 38(51) | 25(40) |
|  | **Sexuality score (mean)**** | 28 | 13 | 13 | 13 | 12 | 9 | 11 | 31 |
| Hormonal /vitality  domain | Hot flashes£ | 20(28) | 39(53) | 43(55) | 34(45) | 44(56) | 34(46) | 25(35) | 10(18) |
| Breast tenderness/enlargement£ | 1(1) | 2(3) | 2(3) | 2(3) | 4(5) | 6(9) | 6(9) | 2(4) |
| Depression£ | 5(7) | 4(6) | 3(4) | 5(7) | 7(10) | 11(16) | 6(9) | 2(4) |
| Lack of energy£ | 10(14) | 27(38) | 21(28) | 16(21) | 19(24) | 21(29) | 17(24) | 11(19) |
| Weight change£ | 3(4) | 4(6) | 14(19) | 16(21) | 19(24) | 15(21) | 16(23) | 7(12) |
|  | **Hormonal/vitality score (mean)**** | 83 | 83 | 73 | 75 | 71 | 71 | 73 | 85 |
| *None/very poor or poor, **higher score indicates better function, £ moderate or severe symptoms. | | | | | | | | | |
